# Supplementary material for: Nanoscale Co-based catalysts for low-temperature CO oxidation
Source: Royal Society of Chemistry journal article supplement (doi:10.1039/c4cy01147c), 2014-10-29
Supplement: c4cy01147c1.pdf [file c4cy01147c1.pdf]

## Supplementary Data

# Nanoscale Co-Based Catalysts for Low-Temperature CO Oxidation

Xi Wang, Wei Zhong, and Yingwei Li\*

School of Chemistry and Chemical Engineering, South China University of Technology,  
Guangzhou 510640, China.

\* To whom correspondence should be addressed. E-mail: liyw@scut.edu.cn

**This PDF file includes:**

Figs. S1 to S8

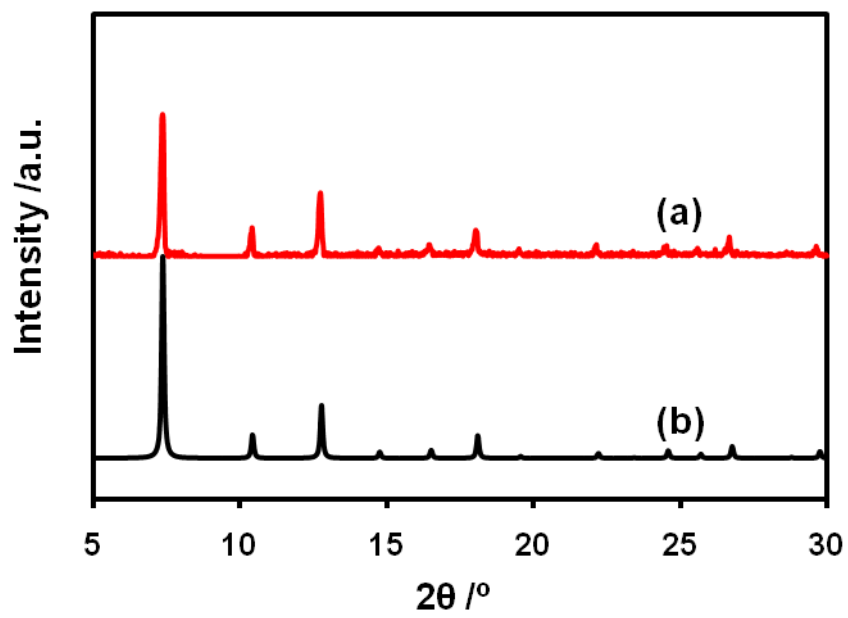

**Figure S1.** Powder XRD patterns of ZIF-67: (a) as-synthesized, and (b) simulated.

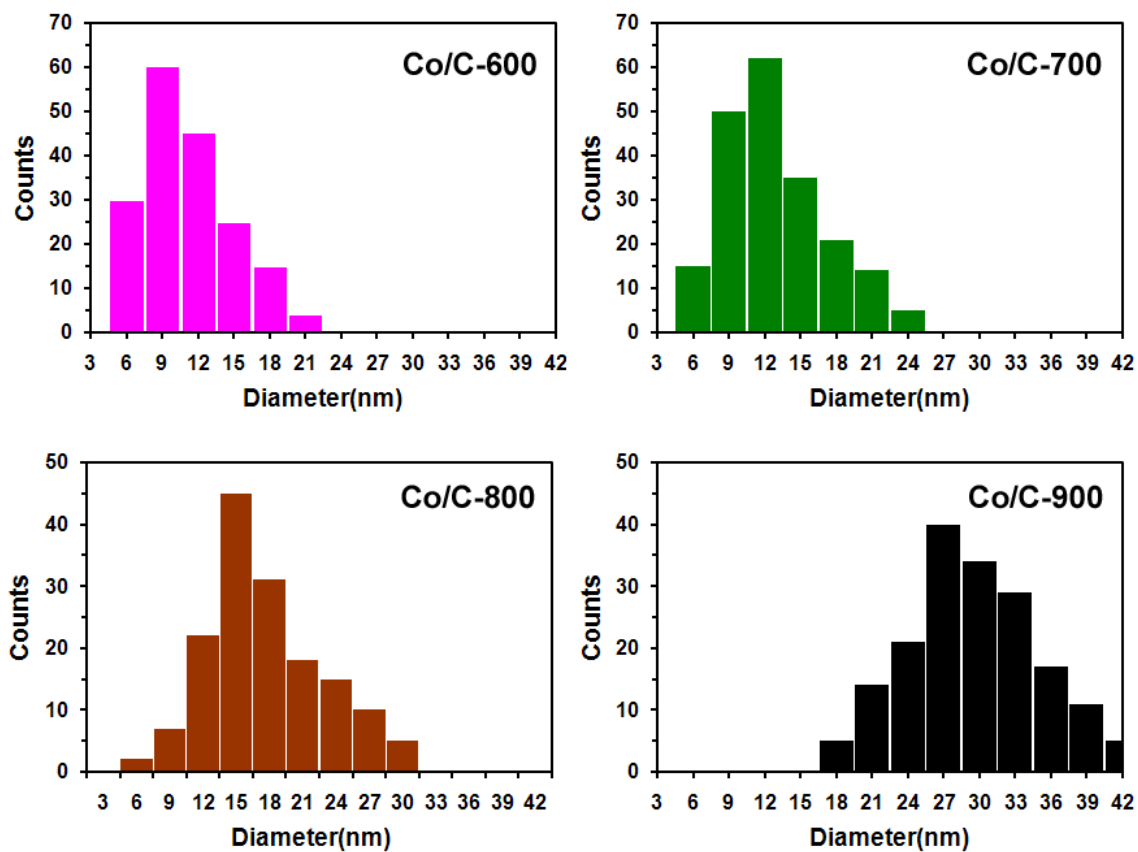

**Figure S2.** Size distribution of Co nanoparticles in Co/C-X corresponding to TEM micrographs in Figure 2.

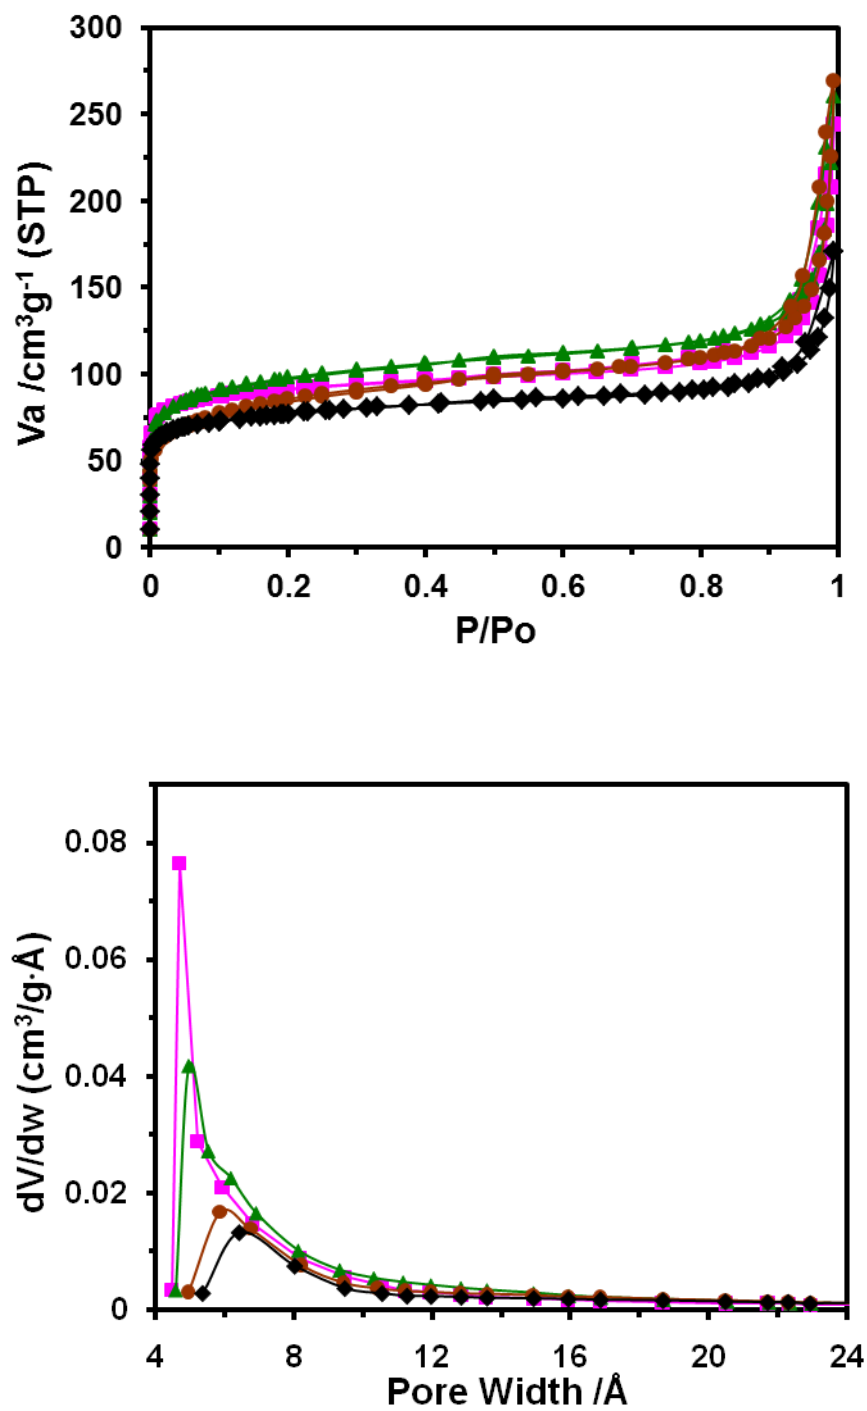

**Figure S3.** Nitrogen adsorption-desorption isotherms at 77 K (top) and corresponding pore-size distribution curves of Co/C-600 (■), Co/C-700 (▲), Co/C-800 (●), and Co/C-900 (◆).

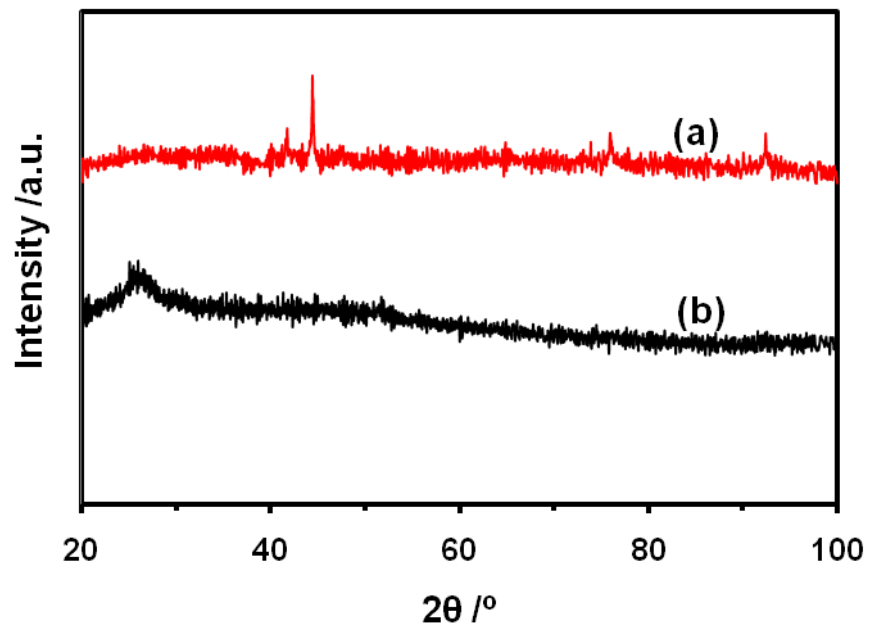

**Figure S4.** Powder XRD patterns of (a) Co/C-600-Co, and (b) Co/C-600-C.

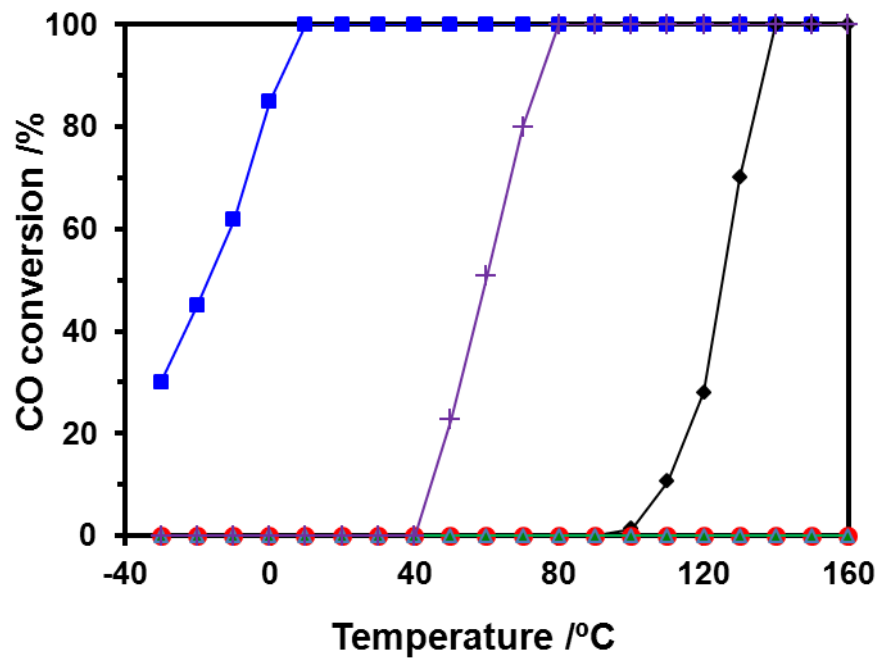

**Figure S5.** Conversion as a function of reaction temperature for CO oxidation over Co/C-600 (■), Co/C-600-Co (◆), Co/C-600-C (●), Co/AC (+), and Co and AC physical mixture (▲) under dry gas conditions.

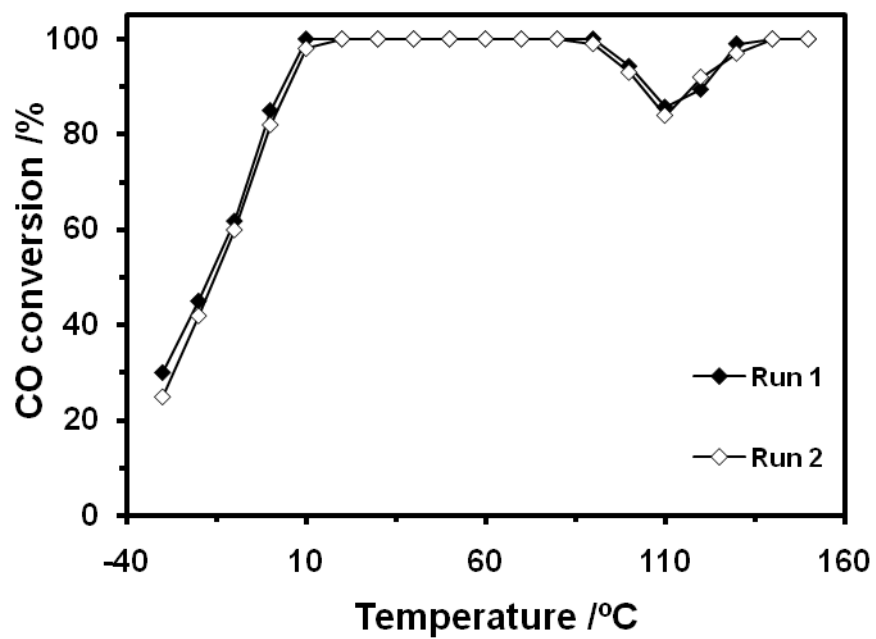

**Figure S6.** Conversion as a function of reaction temperature for CO oxidation over Co/C-600 under wet gas conditions.

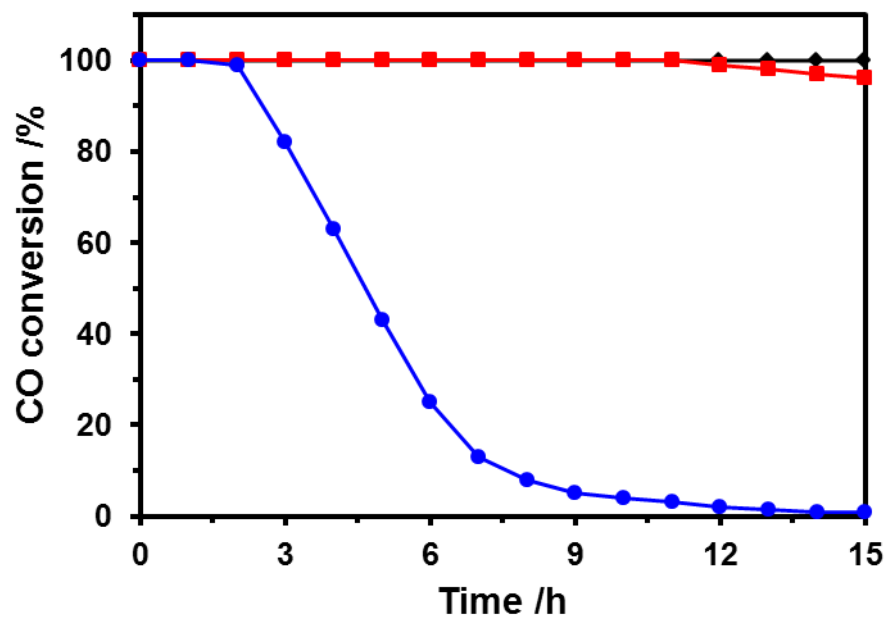

**Figure S7.** Effect of H<sub>2</sub>O concentration on the stability of the Co/C-600 for CO oxidation at a constant temperature of 25 °C for 15 h under 500 ppm moisture (■), 4 vol.% moisture (●), and dry (◆) conditions, respectively.



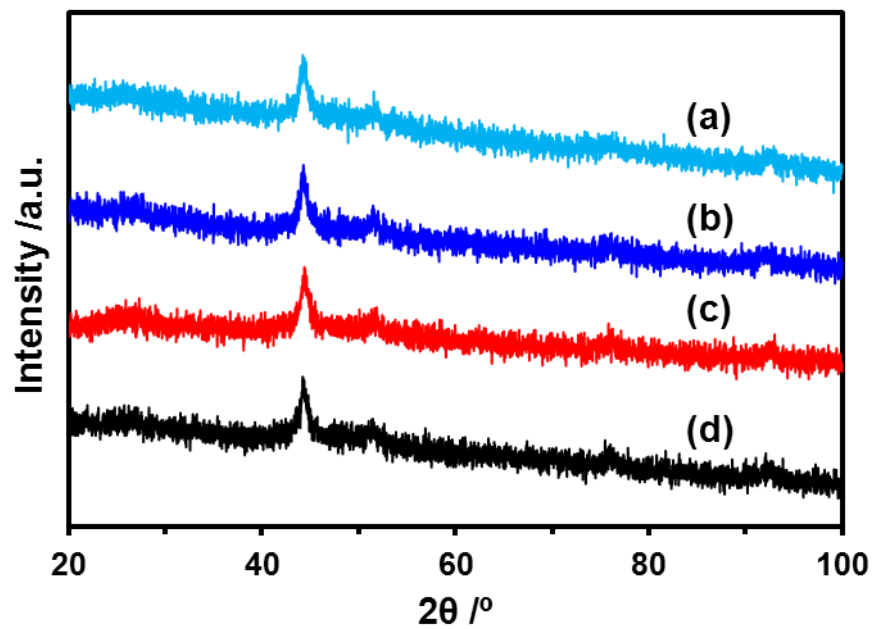

**Figure S8.** Powder XRD patterns of fresh (a) and used Co/C-600 after the first (b), second (c), and third (d) run of stability test under wet gas conditions corresponding to results in Figure 10.
